# Supplementary material
Source: Springer Nature journal article supplement (https://www.springermedizin.de/resource/supplementary/12998_2008_84_MOESM2_ESM.pdf/9623524)
Supplement: MOESM2 [file 9623524]

**Patient Recruitment:**  
Advertisements at Murdoch University (MU), Community boards, Newspapers & emails to MU staff and students

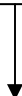

**Clinic visit:**  
Screening questionnaire  
History and Physical examination  
Informed consent

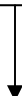

**Baseline Visit:**  
VAS, Oswestry, SF-36 and socioeconomic data  
Random group assignment

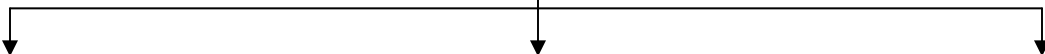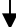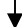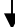

**Spinal Manipulative Therapy:**  
10 sessions over 3-4 weeks

**Graston Therapy:**  
2 treatments/ week over 3-4 weeks

**Placebo:**  
8 minutes of US  
10 sessions over 3-4 weeks

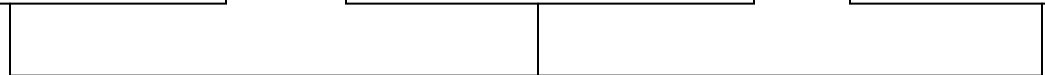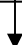

**One week follow up:**  
VAS, Oswestry, SF-36 via mail

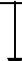

**Four week follow up:**  
VAS, Oswestry, SF-36 via mail

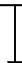

**Three month follow up:**  
VAS, Oswestry, SF-36 via mail

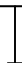

**Six month and 1 year follow up:**  
VAS, Oswestry, SF-36 via mail  
Log book collected i.e. additional treatment sought, adverse effects from treatment
